# Supplementary material
Source: PubMed Central journal article supplement (PMC4790120)

Supplemental Figure 1

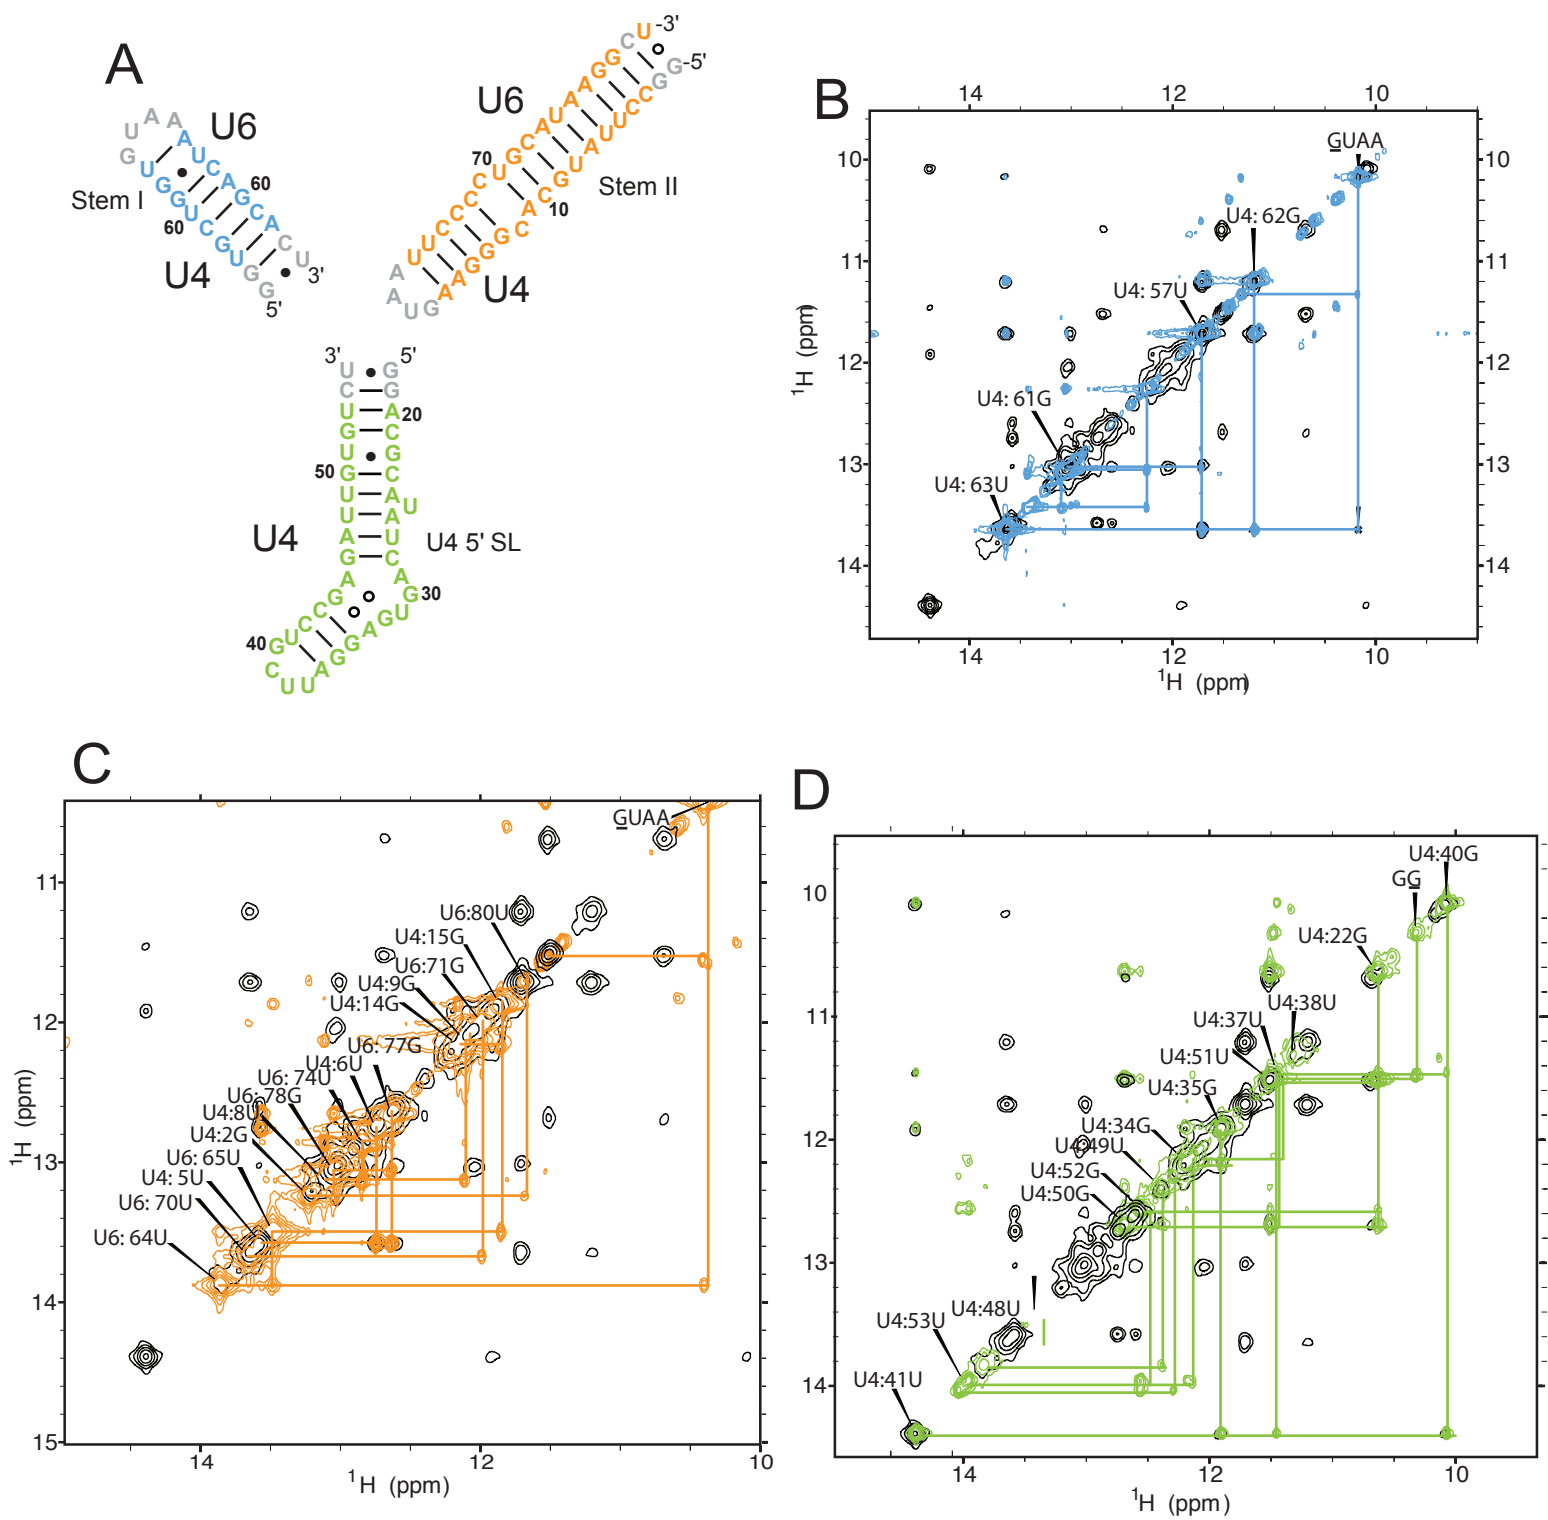

Supplement: NIHMS742489-supplement-3.pdf [file NIHMS742489-supplement-3.pdf]

Supplemental Figure 2

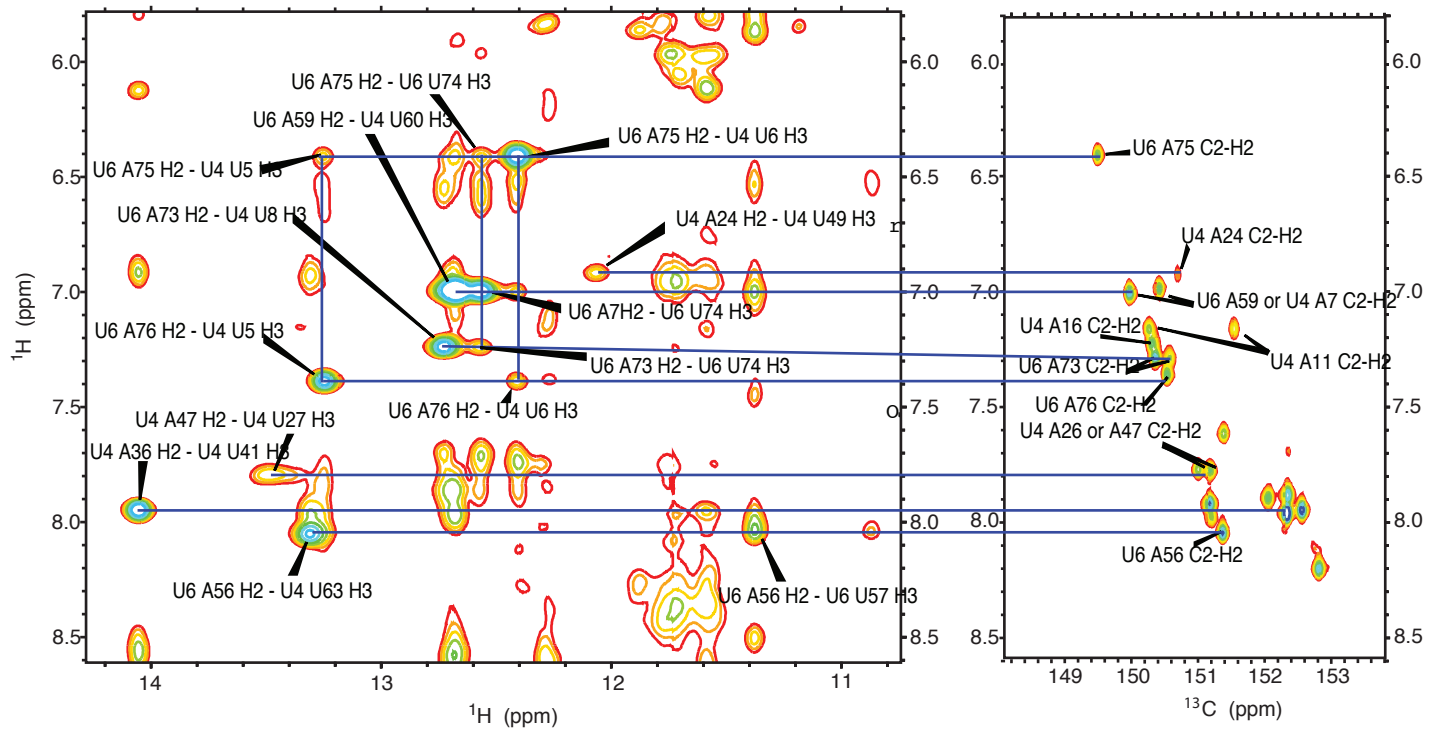

Supplement: NIHMS742489-supplement-5.pdf [file NIHMS742489-supplement-5.pdf]
